# Supplementary material for: Akt-mediated phosphorylation of Bmi1 modulates its oncogenic potential, E3 ligase activity, and DNA damage repair activity in mouse prostate cancer
Source: JCI journal article supplement (doi:10.1172/jci57477), 2012-04-16
Supplement: sd1 [file 1]

301 Moved Permanently

# Moved Permanently

The document has moved here.
